# Supplementary material for: Elucidation of the structural features and photoluminescence properties of a hydrothermally-synthesized γ-KEu(MoO4)2 microcrystal phosphor with metastable orthorhombic structure and differences in the luminescence properties by structure transition due to Y3+-dilution
Source: Royal Society of Chemistry journal article supplement (doi:10.1039/d3nj05866b), 2024-01-01
Supplement: d3nj05866b1.pdf [file d3nj05866b1.pdf]

Electronic supplementary information (ESI) for:

**Elucidation of Structural Features and Photoluminescence Properties for Hydrothermally-synthesized  $\gamma$ -KEu(MoO<sub>4</sub>)<sub>2</sub> Microcrystal Phosphor with Metastable Orthorhombic Structure and Differences of Luminescence Properties by Structure Transition Due to Y<sup>3+</sup>-dilution**

Takuya Hasegawa,<sup>a,†</sup> Suzuka Noda,<sup>a</sup> Wataru Hikita,<sup>b</sup> Kenji Toda,<sup>b</sup> Ayahisa Okawa<sup>a</sup> and Shu Yin<sup>a,c</sup>

<sup>a</sup> *Institute of Multidisciplinary Research for Advanced Material (IMRAM), Tohoku University*

<sup>c</sup> *Graduate School of Science and Technology, Niigata University*

<sup>c</sup> *Advanced Institute for Materials Research (WPI-AIMR), Tohoku University*

†Corresponding author:

Dr. Takuya Hasegawa

Tel/Fax +81-22-217-5598, E-mail: [hase@tohoku.ac.jp](mailto:hase@tohoku.ac.jp)

## ***Contents***

1. **Table S1** Results of elemental analysis by XPS for KEM-HT and KEM-SSR
2. **Table S2** Atomic parameters refined by Rietveld analysis: KEM-HT and KEM-SSR
3. **Table S3** Structural and atomic parameters optimized by DFT calculation:  $\alpha$ -KEu(MoO<sub>4</sub>)<sub>2</sub> and  $\gamma$ -KEu(MoO<sub>4</sub>)<sub>2</sub>
4. **Figure S1** The SAED patterns of KEM-HT and KEM-SSR
5. **Figure S2** Comparison of PL spectra under various excitation bands of (blue) CTS and (red)  ${}^7F_0 \rightarrow {}^5L_6$  transition of Eu<sup>3+</sup>: (A) KEM-HT and (B) KEM-SSR phosphors.
6. **Figure S3** Contour plots of the temperature-dependent PL spectra of the (A) KEM-HT and (B) KEM-SSR. (C) Temperature dependency of the PL peak intensity for the KEM-HT and KEM-SSR.
7. **Figure S2** Spin-considered partial and total DOSs of  $\gamma$ -KEu(MoO<sub>4</sub>)<sub>2</sub>: (top) up-spin and (bottom) down-spin
8. **Figure S3** Spin-considered partial and total DOSs of  $\alpha$ -KEu(MoO<sub>4</sub>)<sub>2</sub>: (top) up-spin and (bottom) down-spin

**Table S1** Results of elemental analysis by XPS for KEM-HT and KEM-SSR

| Samples | Components / at% |       |       |
|---------|------------------|-------|-------|
|         | K                | Eu    | Mo    |
| KEM-HT  | 22.35            | 23.33 | 54.32 |
| KEM-SSR | 24.89            | 20.83 | 54.28 |

**Table S2** Atomic parameters refined by Rietveld analysis: KEM-HT and KEM-SSR

| KEM-HT |         |       |           |            |            |                          |
|--------|---------|-------|-----------|------------|------------|--------------------------|
| Atom   | Wyckoff | Occ.* | x         | y          | z          | Ueq.** (Å <sup>2</sup> ) |
| Mo1    | 8d      | 1     | 0.5213(5) | 0.10259(8) | -0.0165(3) | 1.38(6)                  |
| Eu1    | 4c      | 1     | 0         | 0.0073(1)  | 0.25       | 0.61(6)                  |
| K1     | 4c      | 1     | 0.5       | 0.2700(3)  | 0.25       | 2.4(2)                   |
| O1     | 8d      | 1     | 0.742(2)  | 0.0967(9)  | 0.157(2)   | 0.5                      |
| O2     | 8d      | 1     | 0.753(2)  | 0.0864(9)  | -0.196(2)  | 3.8(5)                   |
| O3     | 8d      | 1     | 0.254(2)  | 0.0330(5)  | -0.011(3)  | 0.1(3)                   |
| O4     | 8d      | 1     | 0.394(2)  | 0.1874(5)  | -0.023(2)  | 2.1(4)                   |

\* Occ.: site occupancy; \*\* Ueq.: isotropic temperature factor

| KEM-SSR |         |      |            |          |           |                        |
|---------|---------|------|------------|----------|-----------|------------------------|
| Atom    | Wyckoff | Occ. | x          | y        | z         | Ueq. (Å <sup>2</sup> ) |
| Eu1     | 2i      | 1    | -0.0678(6) | 0.116(1) | 0.2338(9) | 0.5                    |
| Mo1     | 2i      | 1    | 0.1762(7)  | 0.633(2) | 0.250(1)  | 0.5                    |
| Mo2     | 2i      | 1    | 0.7166(7)  | 0.636(2) | 0.277(1)  | 0.5                    |
| K1      | 2i      | 1    | 0.425(2)   | 0.096(4) | 0.219(3)  | 0.5                    |
| O1      | 2i      | 1    | 0.236(3)   | 0.821(7) | 0.074(6)  | 0.5                    |
| O2      | 2i      | 1    | 0.322(3)   | 0.565(7) | 0.407(5)  | 0.5                    |
| O3      | 2i      | 1    | 0.063(3)   | 0.789(7) | 0.363(5)  | 0.5                    |
| O4      | 2i      | 1    | 0.061(3)   | 0.221(7) | 0.032(6)  | 0.5                    |
| O5      | 2i      | 1    | 0.575(3)   | 0.287(7) | 0.107(5)  | 0.5                    |
| O6      | 2i      | 1    | 0.639(3)   | 0.861(7) | 0.451(6)  | 0.5                    |
| O7      | 2i      | 1    | 0.893(3)   | 0.572(7) | 0.418(5)  | 0.5                    |
| O8      | 2i      | 1    | 0.693(2)   | 0.824(7) | 0.096(6)  | 0.5                    |

**Table S3** Structural and atomic parameters optimized by DFT calculation:  $\alpha$ -KEu(MoO<sub>4</sub>)<sub>2</sub> and  $\gamma$ -KEu(MoO<sub>4</sub>)<sub>2</sub>

| KEM-HT              |            |      |                               |          |          |  |
|---------------------|------------|------|-------------------------------|----------|----------|--|
| Orthorhombic        |            |      | Space group: <i>Pbcn</i> (60) |          |          |  |
| a (Å)               | 5.064564   |      | $\alpha$ (°)                  | 90       |          |  |
| b (Å)               | 17.746437  |      | $\beta$ (°)                   | 90       |          |  |
| c (Å)               | 7.864813   |      | $\gamma$ (°)                  | 90       |          |  |
| V (Å <sup>3</sup> ) | 706.873416 |      |                               |          |          |  |
| Atom                | Wyckoff    | Occ. | x                             | y        | z        |  |
| Mo1                 | 8d         | 1    | 0.5                           | 0.267272 | 0.25     |  |
| Eu1                 | 4c         | 1    | 0                             | 0.008044 | 0.25     |  |
| K1                  | 4c         | 1    | 0.51692                       | 0.104155 | 0.97919  |  |
| O1                  | 8d         | 1    | 0.727607                      | 0.106238 | 0.158903 |  |
| O2                  | 8d         | 1    | 0.741204                      | 0.097224 | 0.802551 |  |
| O3                  | 8d         | 1    | 0.25353                       | 0.032989 | 0.004661 |  |
| O4                  | 8d         | 1    | 0.378985                      | 0.192858 | 0.974072 |  |

  

| KEM-SSR             |          |      |                                        |          |          |  |
|---------------------|----------|------|----------------------------------------|----------|----------|--|
| Triclinic           |          |      | Space group: <i>P</i> <sup>1</sup> (2) |          |          |  |
| a (Å)               | 11.10395 |      | $\alpha$ (°)                           | 112.6113 |          |  |
| b (Å)               | 5.202171 |      | $\beta$ (°)                            | 111.9007 |          |  |
| c (Å)               | 6.797244 |      | $\gamma$ (°)                           | 91.45358 |          |  |
| V (Å <sup>3</sup> ) | 329.7078 |      |                                        |          |          |  |
| Atom                | Wyckoff  | Occ. | x                                      | y        | z        |  |
| Eu1                 | 2i       | 1    | 0.555987                               | 0.873101 | 0.750152 |  |
| Mo1                 | 2i       | 1    | 0.061835                               | 0.871111 | 0.75129  |  |
| Mo2                 | 2i       | 1    | 0.823478                               | 0.366168 | 0.748041 |  |
| K1                  | 2i       | 1    | 0.284219                               | 0.351266 | 0.716701 |  |
| O1                  | 2i       | 1    | 0.799853                               | 0.251384 | 0.946652 |  |
| O2                  | 2i       | 1    | 0.678621                               | 0.441227 | 0.586036 |  |
| O3                  | 2i       | 1    | 0.91295                                | 0.135642 | 0.59429  |  |
| O4                  | 2i       | 1    | 0.934455                               | 0.711827 | 0.91892  |  |
| O5                  | 2i       | 1    | 0.410167                               | 0.645212 | 0.898326 |  |
| O6                  | 2i       | 1    | 0.339659                               | 0.10054  | 0.527838 |  |
| O7                  | 2i       | 1    | 0.129621                               | 0.45519  | 0.567619 |  |
| O8                  | 2i       | 1    | 0.254584                               | 0.186828 | 0.88685  |  |

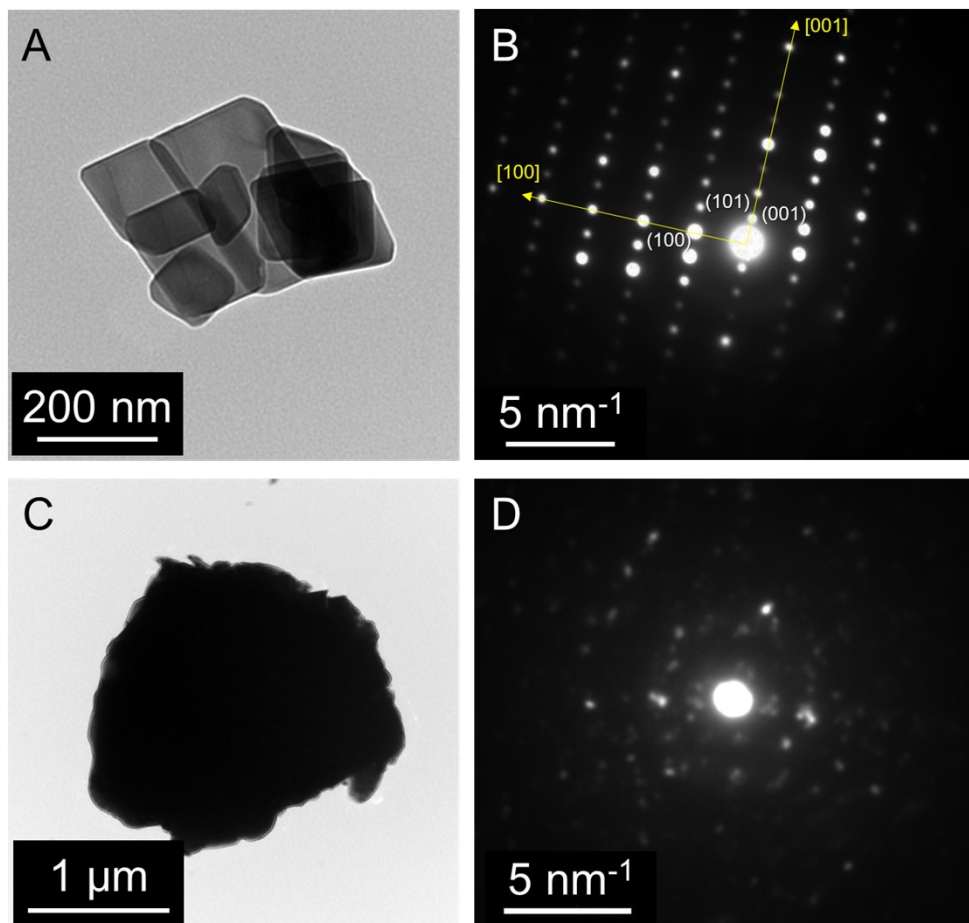

**Figure S1** The SAED patterns of KEM-HT and KEM-SSR

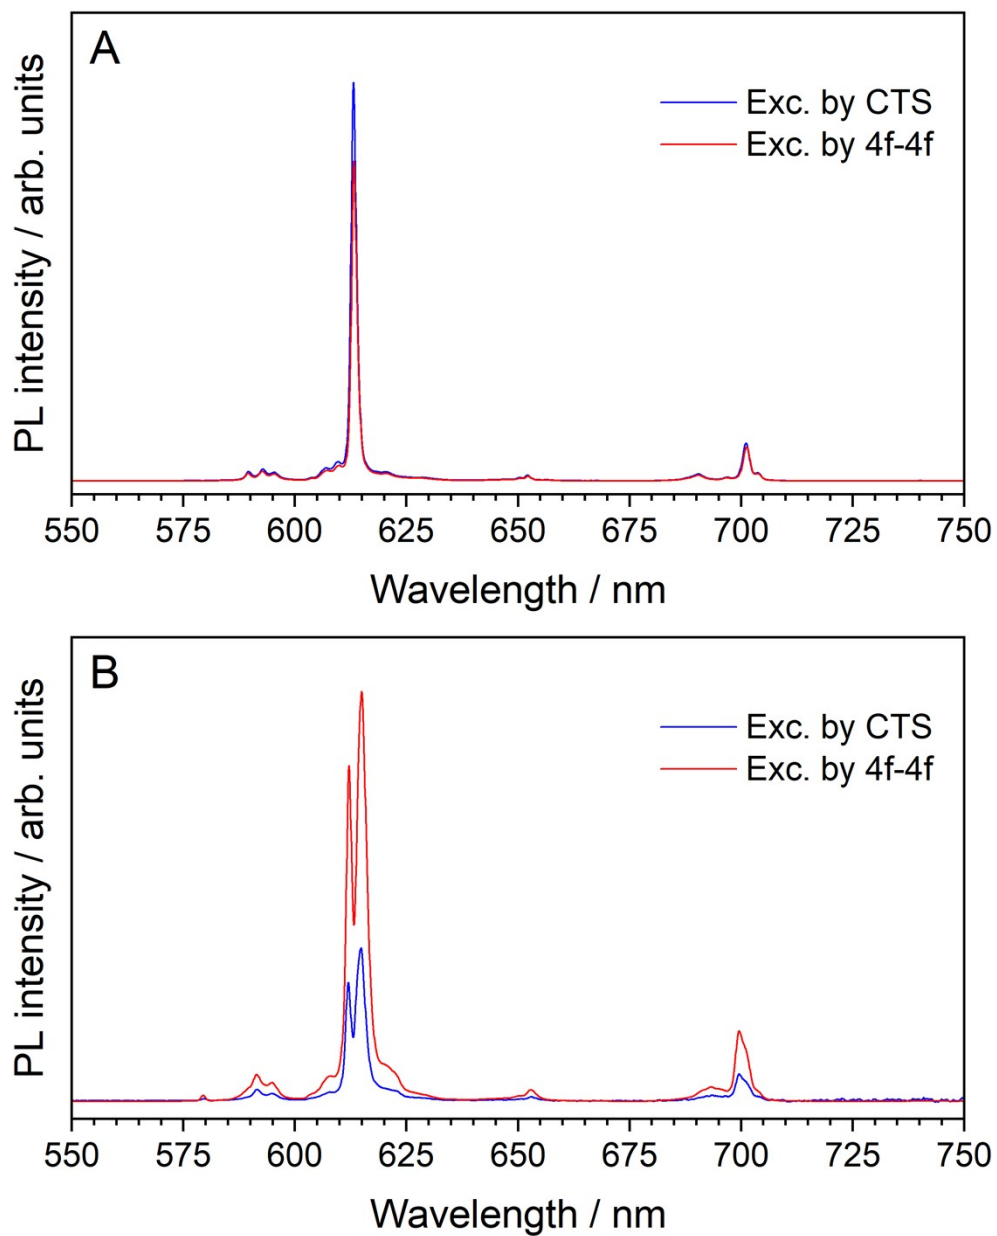

**Figure S2** Comparison of PL spectra under various excitation bands of (blue) CTS and (red)  ${}^7F_0 \rightarrow {}^5L_6$  transition of  $\text{Eu}^{3+}$ : (A) KEM-HT and (B) KEM-SSR phosphors.

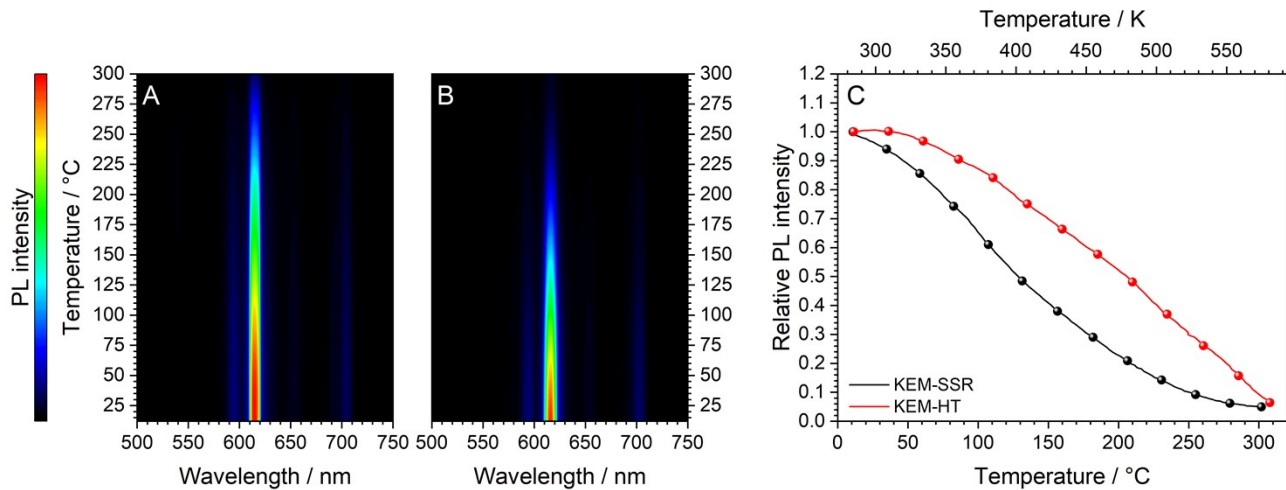

**Figure S3** Contour plots of the temperature-dependent PL spectra of the (A) KEM-HT and (B) KEM-SSR. (C) Temperature dependency of the PL peak intensity for the KEM-HT and KEM-SSR.



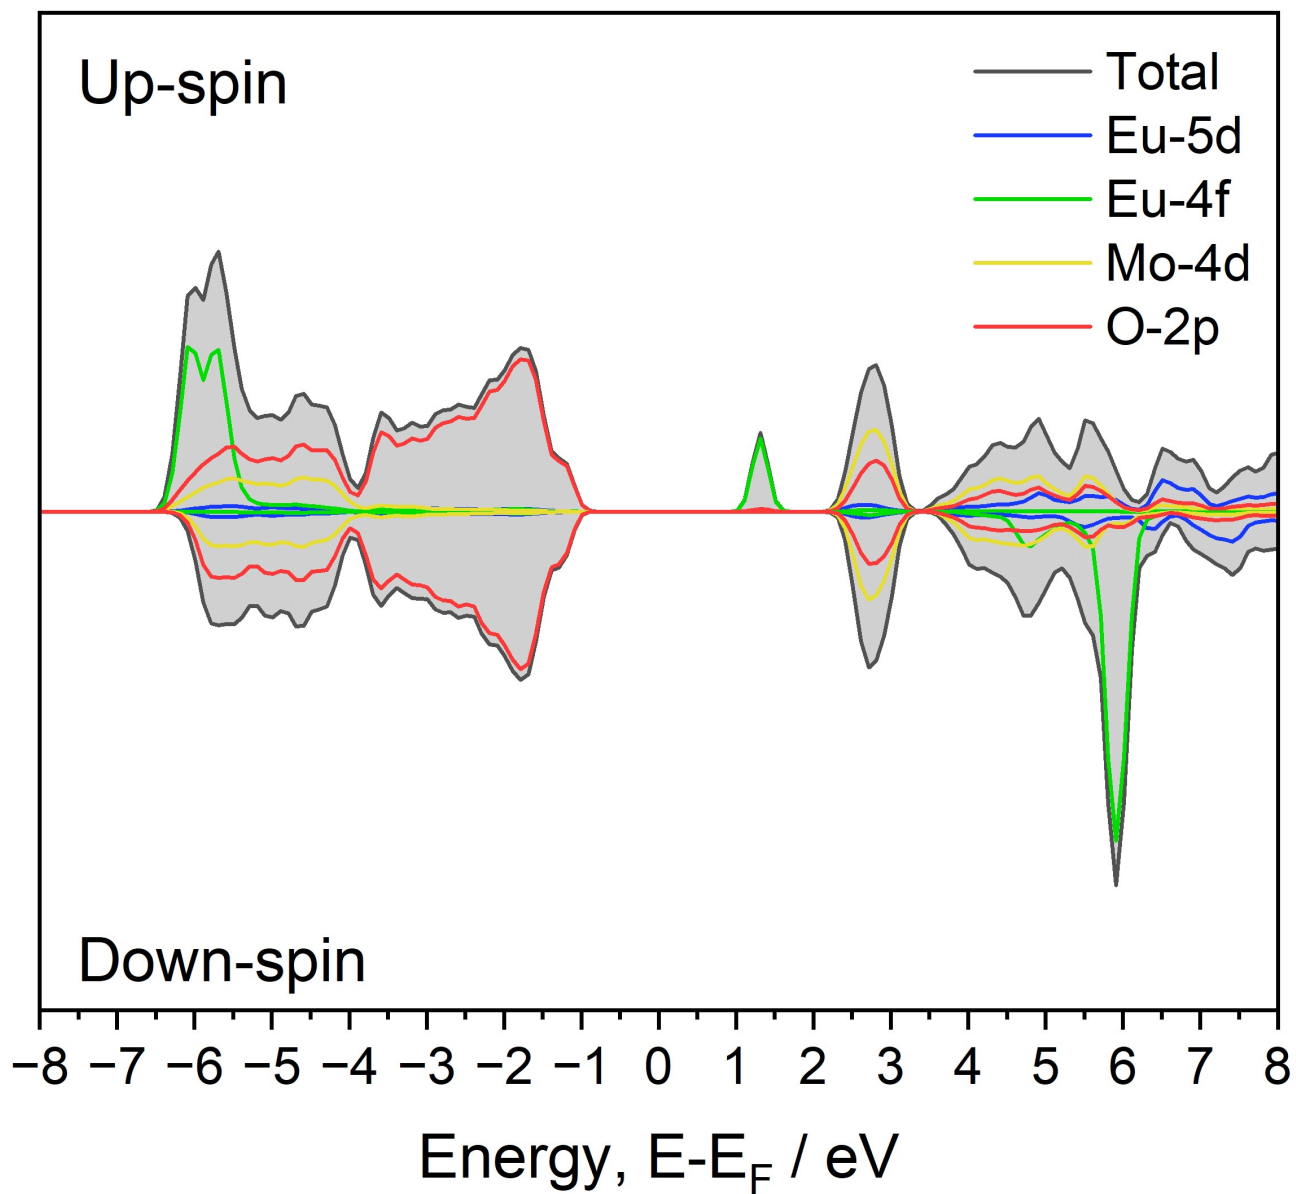

**Figure S4** Spin-considered partial and total DOSs of  $\gamma$ -KEu(MoO<sub>4</sub>)<sub>2</sub>: (top) up-spin and (bottom) down-spin

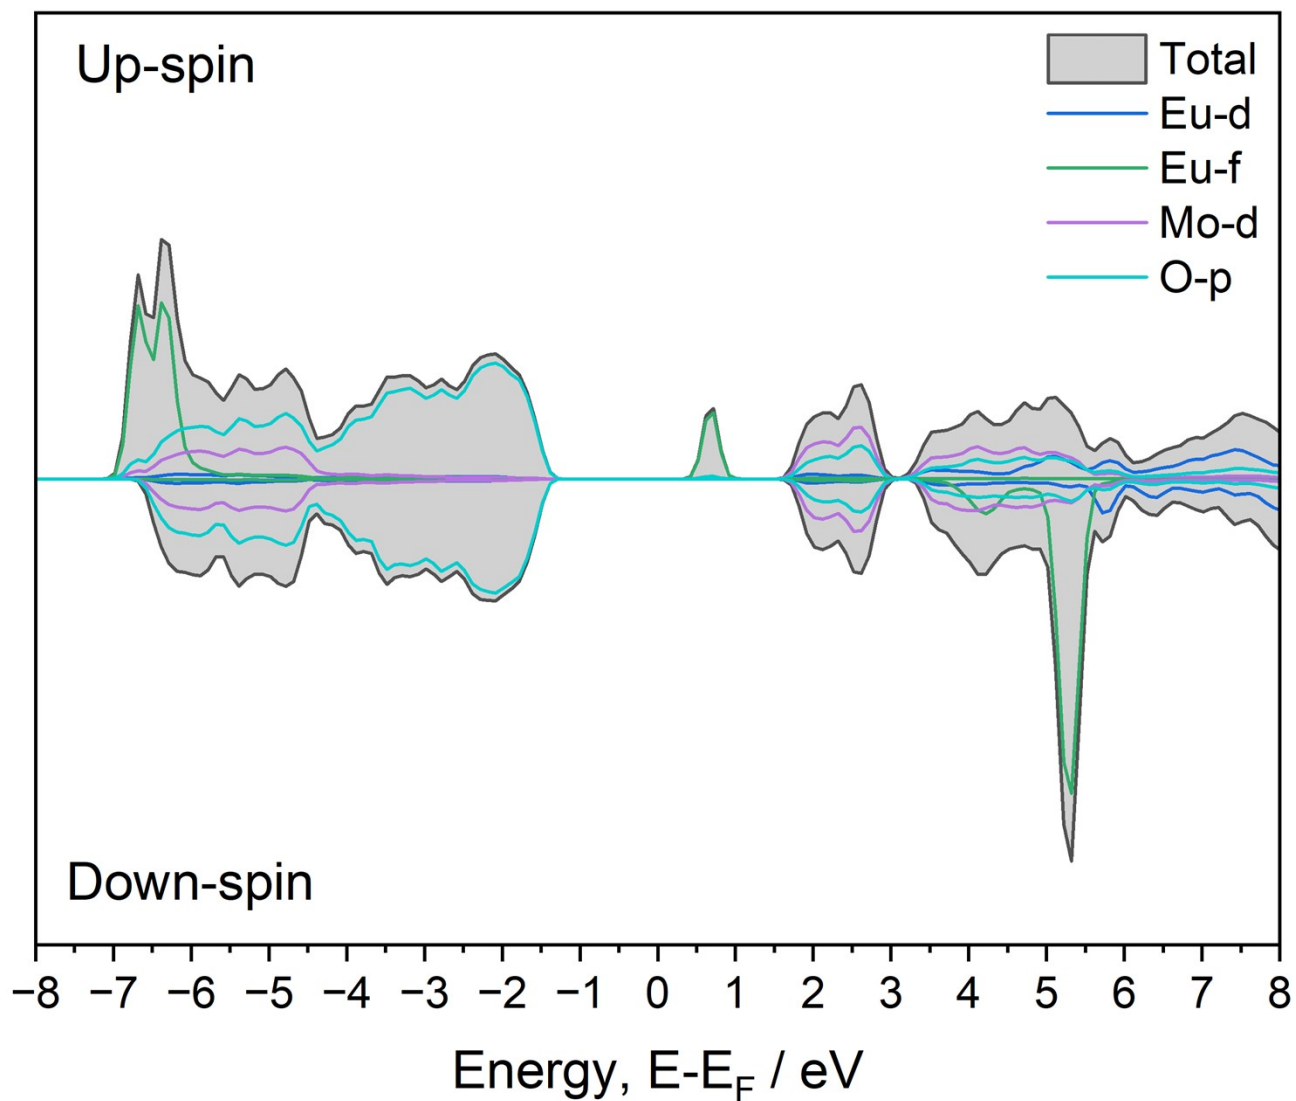

**Figure S5** Spin-considered partial and total DOSs of  $\alpha$ -KEu(MoO<sub>4</sub>)<sub>2</sub>: (top) up-spin and (bottom) down-spin
